# Supplementary material for: Mental sequelae of the COVID-19 pandemic in children with and without complex medical histories and their parents: well-being prior to the outbreak and at four time-points throughout 2020 and 2021
Source: Springer Nature journal article supplement (doi:10.1007/s00787-022-02014-6), 2022-07-22
Supplement: MOESM1 [file 23294740]

## Supplementary information

**Title:** Mental sequelae of the Covid-19 pandemic in children with and without complex medical histories and their parents: Well-being prior to the outbreak and throughout 2020 and 2021

**Journal:** European Child & Adolescent Psychiatry

**Authors:** Melanie Ehrler, Cornelia F. Hagmann, Alexandra Stoeckli, Oliver Kretschmar, Markus A. Landolt, Beatrice Latal, Flavia M. Wehrle

**Address correspondence to** Flavia M. Wehrle, Child Development Center, University Children's Hospital Zurich, 75 Steinwiesstrasse, 8032 Zurich, Switzerland, [flavia.wehrle@kispi.uzh.ch].

### Supplementary Figure 1: Flow chart

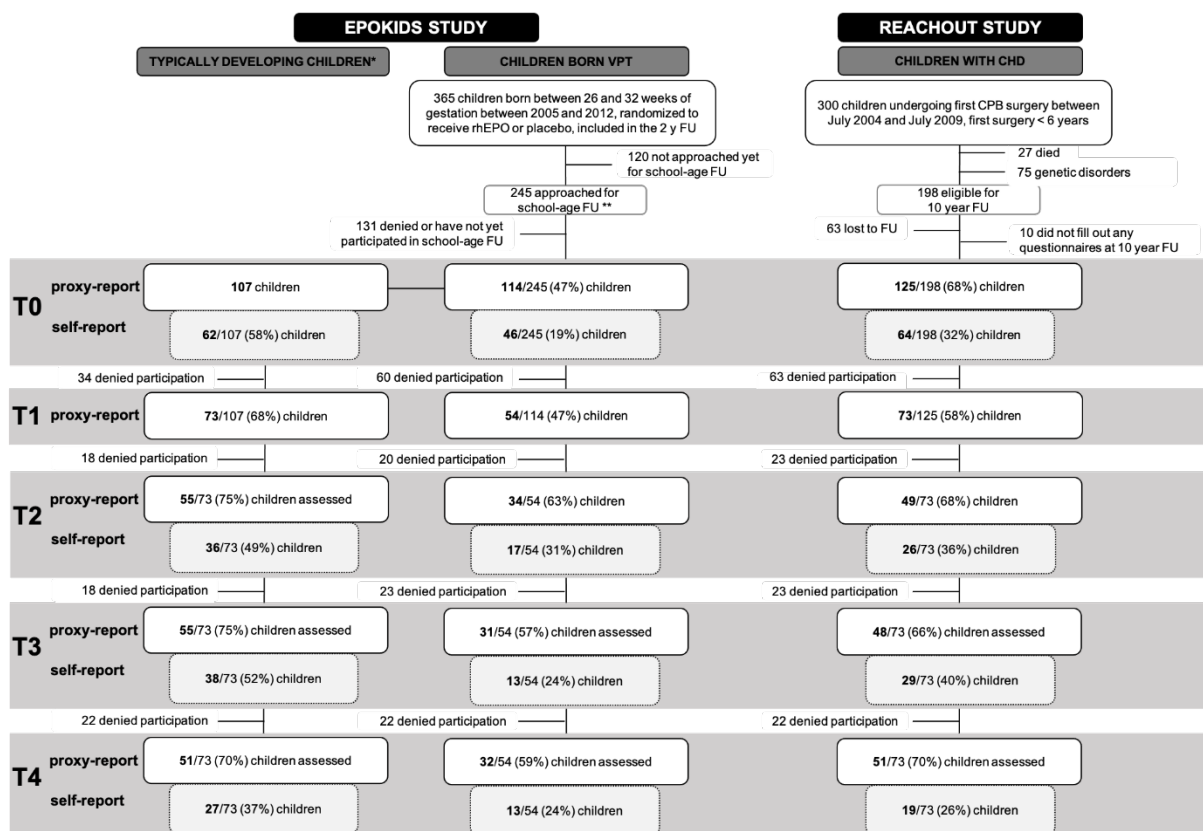

*Note:* Flow chart refers to the child self- and proxy-reports. Numbers of participating parents is lower because some parents reported on more than one child (e.g., T1: 25 parents reported on more than one child, thus, self-reports of 175 parents of 200 children are available). T0 = before the COVID-19 pandemic, T1 = first wave of the COVID-19 pandemic (April-May 2020), T2 = second wave of the COVID-19 pandemic (October–November 2020), T3 = third wave of the COVID-19 pandemic (April–May 2021), T4 = fourth wave of the COVID-19 pandemic (October–November 2021). \* Typically developing children were recruited as control group for the EpoKids study at school-age \*\*Ongoing study. FU = follow up, CHD=congenital heart disease, CPB = cardiopulmonary bypass surgery. VPT: very preterm. Epokids study<sup>1</sup>. Reachout study<sup>2</sup>.

## References

- 1) Wehrle FM, Held U, O’Gorman RT, et al. Long-term neuroprotective effect of erythropoietin on executive functions in very preterm children (EpoKids): protocol of a prospective follow-up study. *BMJ open*. 2018;8(4):e022157-e022157.
- 2) Werninger I, Ehrler M, Wehrle FM, et al. Social and behavioral difficulties in 10-year-old children with congenital heart disease: Prevalence and risk factors. *Frontiers in pediatrics*. 2020;8.

## Supplementary Table 1: Overview of nationwide measures to reduce the spread of COVID-19 in Switzerland.

| Wave                                            | Nationwide restrictions                                                         |
|-------------------------------------------------|---------------------------------------------------------------------------------|
| 1st wave<br>(April/May 2020)                    | School closure                                                                  |
|                                                 | Prohibition of public events                                                    |
|                                                 | Prohibition of private events                                                   |
|                                                 | Closure of nonessential and retail services                                     |
|                                                 | Reduction of public transport service                                           |
| 2 <sup>nd</sup> wave<br>(October/November 2020) | School closure for adult education only                                         |
|                                                 | Mandatory face masks in public space for people at the age of 12 years or older |
|                                                 | Prohibition of public events with >50 people                                    |
|                                                 | Prohibition of private events with >10 people                                   |
|                                                 | Prohibition of leisure activities with >15 people                               |
|                                                 | Restriction in restaurants to 4 people per table and earlier closing times      |
| 3 <sup>rd</sup> wave<br>(April/May 2021)        | Prohibition of adult education with > 50 people                                 |
|                                                 | Mandatory face masks in public space for people at the age of 12 years or older |
|                                                 | Prohibition of public events with >50 people (inside) and >100 people (outside) |
|                                                 | Prohibition of private events with >15 people                                   |
|                                                 | Prohibition of leisure activities with >15 people                               |

Inner area of restaurants closed; outdoor area restricted to 4 people per table

---

|                                                 |                                                                                                                                                                                                                                                                                                                                                                                                                                                                                                                                                                                         |
|-------------------------------------------------|-----------------------------------------------------------------------------------------------------------------------------------------------------------------------------------------------------------------------------------------------------------------------------------------------------------------------------------------------------------------------------------------------------------------------------------------------------------------------------------------------------------------------------------------------------------------------------------------|
| 4 <sup>th</sup> wave<br>(October/November 2021) | Adult education with COVID certificate<br><br>Mandatory face masks in public indoor space for people at the age of 12 years or older (no mandatory face masks when COVID certificate is required)<br><br>COVID certificate for all public events inside (outside only with > 500 people)<br><br>Private events restricted to <30 people inside (outside <50 people)<br><br>No restrictions for leisure activities with <30 people. COVID certificate for leisure activities with >30 people.<br><br>Inner area of restaurants, bars and clubs is open for people with COVID certificate |
|-------------------------------------------------|-----------------------------------------------------------------------------------------------------------------------------------------------------------------------------------------------------------------------------------------------------------------------------------------------------------------------------------------------------------------------------------------------------------------------------------------------------------------------------------------------------------------------------------------------------------------------------------------|

---

*Note.* Some cantons may have ordered stricter measures. Source: Federal Office of Public Health (FOPH) Switzerland <https://www.bag.admin.ch/bag/en/home/krankheiten/ausbrueche-epidemien-pandemien/aktuelle-ausbrueche-epidemien/novel-cov/massnahmen-des-bundes.html> (accessed January 14<sup>th</sup> 2022). COVID certificate was issued if subject was fully vaccinated, recovered from COVID-19 within the past 6 months, was tested negative for COVID-19 within the past three days (PCR) or one day (rapid test).
